# Supplementary material for: Modulation of the Gut Microbiota in Rats by Hugan Qingzhi Tablets during the Treatment of High‐Fat‐Diet‐Induced Nonalcoholic Fatty Liver Disease
Source: Hindawi journal article supplement (doi:10.1155/2018/7261619), 2018-01-01
Supplement: f1 [file 7261619.f1.pdf]

## Supplementary Material :

**Additional files 1: Table 1** Different components in the HQT formula.

**Table 1: Herbal constituents of Hagan Qingzhi.**

| Pharmaceutical name | English name                             | Botanical name                       | Family       | Part used | Chinese name | Ratio |
|---------------------|------------------------------------------|--------------------------------------|--------------|-----------|--------------|-------|
| Rhizoma Alismatis   | Rhizome of<br>oriental water<br>plantain | Alisma orientalis (Sam.) Juzep.      | Alismataceae | Rhizome   | Ze Xie       | 6     |
| Fructus Crataegi    | Hawthorn fruit                           | Crataegus pinnatifida Bunge          | Rosaceae     | Fruit     | Shan Zha     | 6     |
| Pollen Typhae       | Cattail pollen                           | Typha orientalis C. Presl            | Typhaceae    | Pollen    | Pu Huang     | 3     |
| Folium Nelumbinis   | Lotus leaf                               | Nelumbo nucifera (Gaertn.)           | Nymphaeaceae | Leaf      | He Ye        | 4     |
| Radix Notoginseng   | Sanchi                                   | Panax pseudoginseng var. notoginseng | Araliaceae   | Root      | San Qi       | 1     |

**Additional files 2: Table 2** The community coverage index of the NFD, HFD and HQT groups.

Noted: P=prophase, M= metaphase, A=anaphase.

| Sample\Estimators | coverage | Sample\Estimators | coverage | Sample\Estimators | coverage |
|-------------------|----------|-------------------|----------|-------------------|----------|
| P_NFD_79          | 0.995277 | M_NFD_9           | 0.996243 | A_NFD_69          | 0.995921 |
| P_NFD_6           | 0.995707 | M_NFD_69          | 0.994794 | A_NFD_6           | 0.995009 |
| P_NFD_5           | 0.995653 | M_NFD_6           | 0.99415  | A_NFD_5           | 0.995707 |
| P_NFD_14          | 0.995653 | M_NFD_5           | 0.995492 | A_NFD_13          | 0.995492 |
| P_NFD_13          | 0.995921 | M_NFD_4           | 0.995546 | A_NFD_1           | 0.995707 |
| P_HQT_79          | 0.996458 | M_HQT_79          | 0.996351 | A_HQT_79          | 0.995385 |
| P_HQT_5           | 0.99576  | M_HQT_5           | 0.996404 | A_HQT_7           | 0.996458 |
| P_HQT_4           | 0.995277 | M_HQT_4           | 0.994955 | A_HQT_6           | 0.996458 |
| P_HQT_14          | 0.996243 | M_HQT_3           | 0.995975 | A_HQT_3           | 0.996243 |
| P_HQT_1           | 0.995331 | M_HQT_14          | 0.996243 | A_HQT_14          | 0.995921 |
| P_HFD_9           | 0.995975 | M_HFD_9           | 0.996082 | A_HFD_79          | 0.995868 |
| P_HFD_7           | 0.996029 | M_HFD_7           | 0.99619  | A_HFD_6           | 0.996458 |
| P_HFD_6           | 0.995277 | M_HFD_6           | 0.996136 | A_HFD_5           | 0.995653 |
| P_HFD_5           | 0.995975 | M_HFD_5           | 0.996243 | A_HFD_13          | 0.995653 |
| P_HFD_3           | 0.995814 | M_HFD_1           | 0.99678  | A_HFD_0           | 0.997424 |

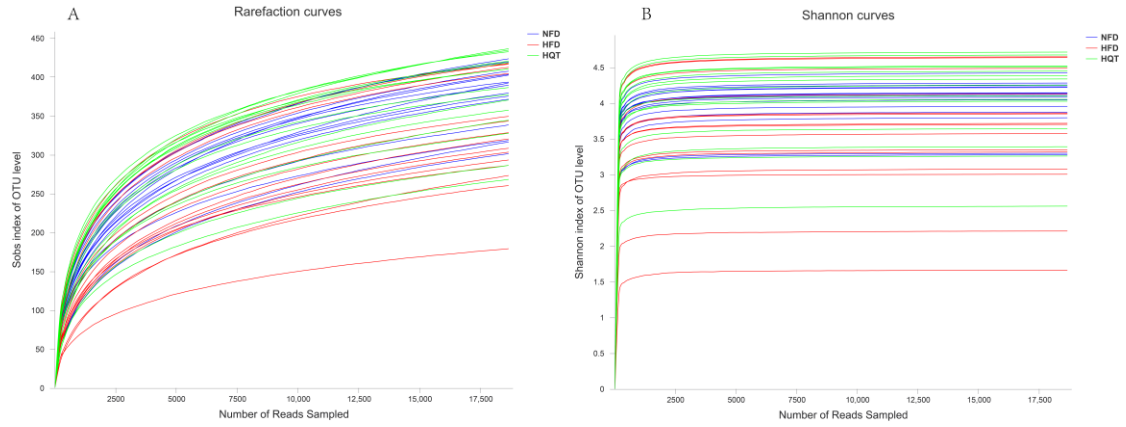

Additional files 3: Fig. 1 The rarefaction curves and Shannon curves of the NFD, HFD and HQT groups.

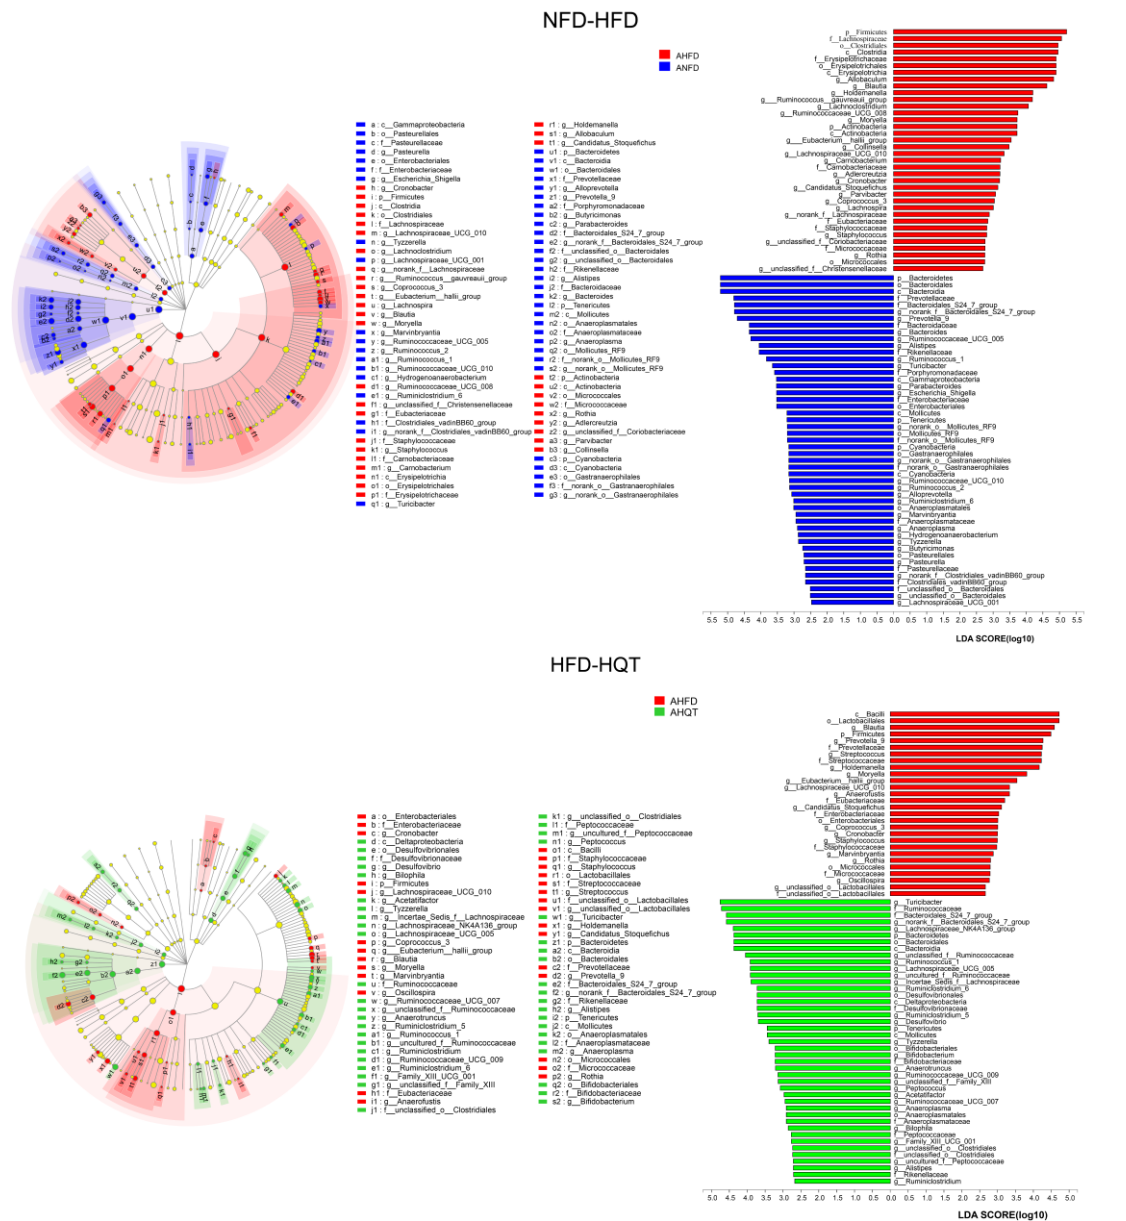

Additional files 4: Fig. 2 Key bacterial alterations in response to the HFD and HQT treatments. (A) Cladogram

generated by the LEfSe analysis (LDA=2) showing enriched taxa in 12-week feces from the NFD (blue) and HFD (red) groups. (B) LDA scores of enriched taxa shown in A. (C) Cladogram generated by the LEfSe analysis (LDA=2) showing enriched taxa in 12-week feces from the HFD (red) and HQT (green) groups. (D) LDA scores of enriched taxa shown in C.
